# Supplementary material for: High expression levels of polymeric immunoglobulin receptor are correlated with chemoresistance and poor prognosis in pancreatic cancer
Source: PubMed Central journal article supplement — Oncol Rep. 2020 May 11;44(1):252–62. doi: 10.3892/or.2020.7610 (PMC7251687; doi:10.3892/or.2020.7610), 2020-05-11
Supplement: Supplementary_Data.pdf [file Supplementary_Data.pdf]

Figure S1. Procedure for establishment of patient-derived xenografts. (A) Fresh tumor tissues were divided into small pieces and implanted into NSG mice in the dorsal subcutaneous area of the upper part of the back by using the transplant needle. (B) Tumor tissues for transplantation were obtained from patients with pancreatic cancer. Fresh tumor tissues were implanted into NSG mice. After the engrafted mass expanded well, the xenograft tumor was re-transplanted for expansion in another NSG mouse using the same procedure. We repeated this procedure and passaged the PDXs. The tumor volume reached  $\sim 1000 \text{ mm}^3$ , the mouse was sacrificed, and the tumor was isolated and transplanted into the next mouse. PDXs, patient-derived xenografts.

A

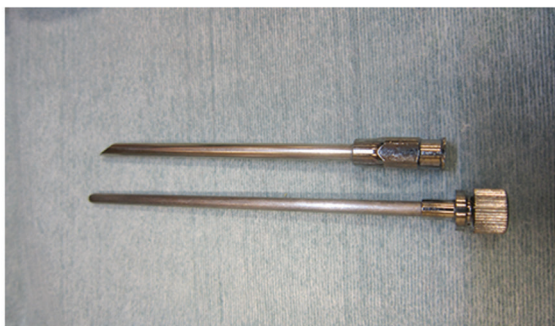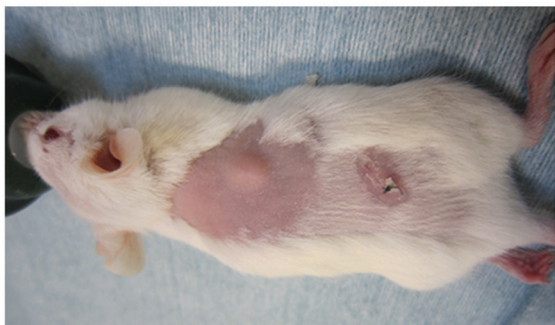

B

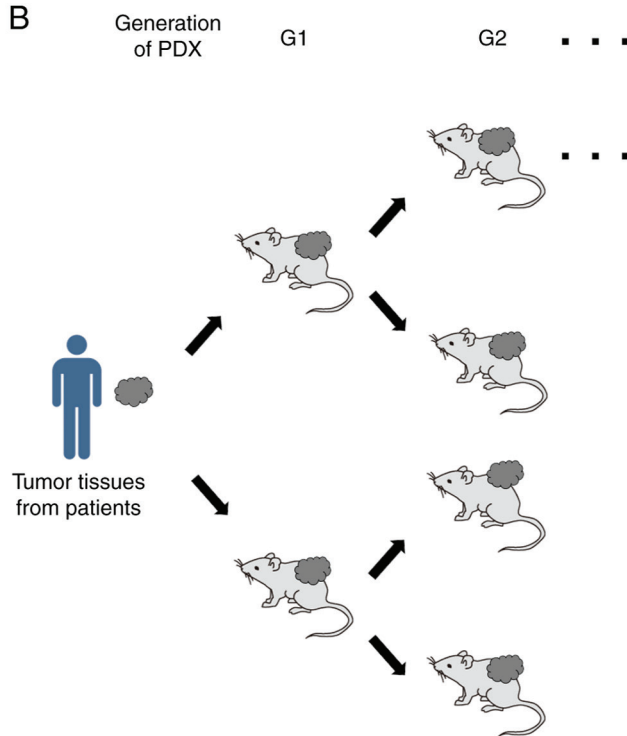

Figure S2. Quantification of pIgR-stained area in 77 pancreatic cancer tissues. The percentage of pIgR-stained area was measured by the Hybrid Cell Count software and analyzed based on the survival time and the expression of pIgR determined by two pathologists. (A) Box-plot diagram revealing the percentage of pIgR-stained area for 77 pancreatic cancer tissues, which were divided into two groups: Low pIgR expression (n=47; median 1%, range 0-7%) and high pIgR expression (n=30; median 23%, range 15-61%). (B) Scatter plot revealing the relationship between the percentage of pIgR-stained area and the survival time.

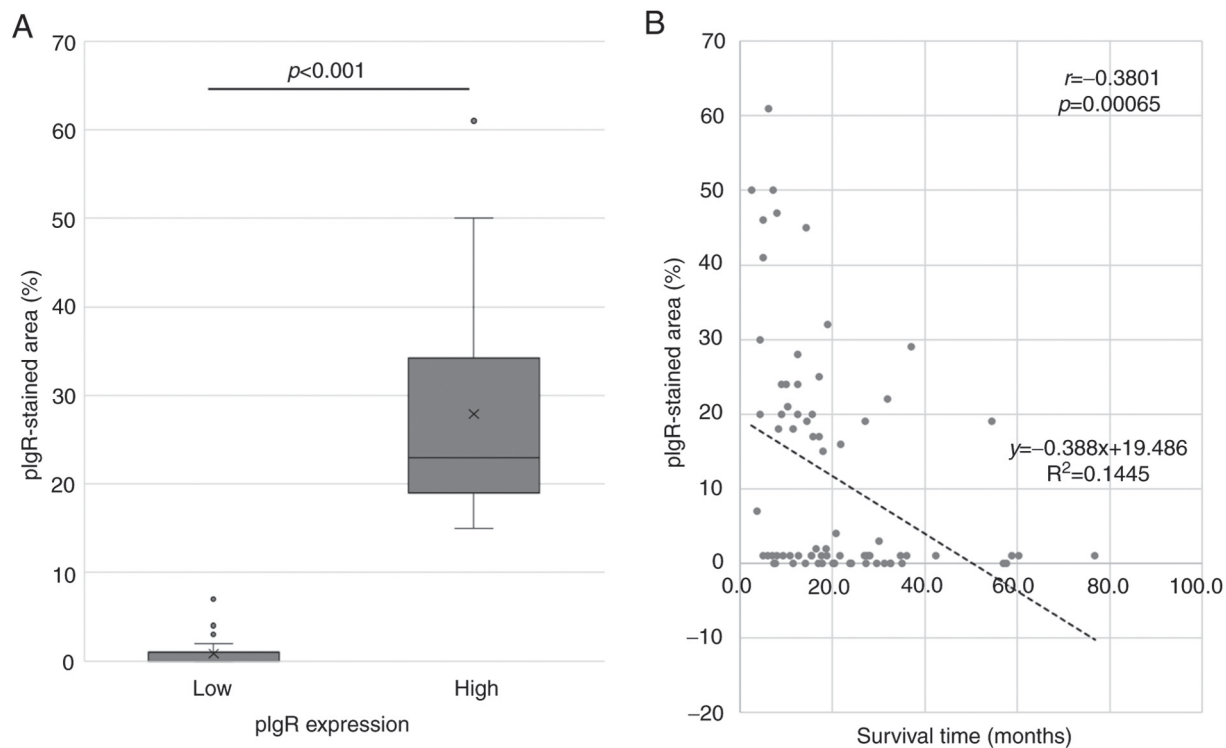

Table SI. Pancreatic cancer PDXs established in this study.

| Patient no. | Age | Sex    | Tumor location       | Pathogenic diagnosis                             | Pathological stage | Generation of PDX |
|-------------|-----|--------|----------------------|--------------------------------------------------|--------------------|-------------------|
| 1           | 62  | Female | Head                 | Moderately differentiated tubular adenocarcinoma | T3N1M0 StageIIB    | G4                |
| 2           | 70  | Male   | Head                 | Poorly differentiated tubular adenocarcinoma     | T3N1M0 StageIIB    | G5                |
| 3           | 73  | Female | Body                 | Moderately differentiated tubular adenocarcinoma | T4N1M0 StageIII    | G5                |
| 4           | 72  | Male   | Pancreatic body/tail | Well-differentiated tubular adenocarcinoma       | T4N2M0 StageIII    | G6                |
| 5           | 64  | Female | Body                 | Poorly differentiated tubular adenocarcinoma     | T4N1M0 StageIII    | G6                |
| 6           | 71  | Male   | Head                 | Adenosquamous carcinoma                          | T3N1M0 StageIIB    | G5                |
| 7           | 79  | Female | Body                 | Moderately differentiated tubular adenocarcinoma | T4N1M0 StageIII    | G6                |
| 8           | 75  | Female | Head                 | Moderately differentiated tubular adenocarcinoma | T4N0M0 StageIII    | G7                |
| 9           | 55  | Male   | Head                 | Well-differentiated tubular adenocarcinoma       | T4N0M0 StageIII    | G6                |
| 10          | 51  | Female | Head                 | Poorly differentiated tubular adenocarcinoma     | T3N1M0 StageIIB    | G6                |

PDXs, patient-derived xenografts.

Table SII. The list of 193 genes analyzed by RNA sequencing using NGS.

|          |         |         |          |         |          |         |          |
|----------|---------|---------|----------|---------|----------|---------|----------|
| ABHD2    | C6orf15 | DYSF    | GPX3     | MACF1   | PKD1     | SIK3    | TMEM40   |
| ABL2     | C9orf9  | EGLN2   | HDAC9    | MAP3K9  | PLA2G4C  | SLAMF7  | TP53INP1 |
| ACE      | CABYR   | EP300   | HIPK2    | MAVS    | PLEC     | SLC26A9 | TRIO     |
| AHNAK2   | CCDC153 | EPHB3   | HSD17B7  | MID1    | PLEKHB1  | SLC43A2 | TRPV4    |
| AKAP13   | CD74    | EPPK1   | HSPB8    | MKLN1   | PLK2     | SLC5A1  | TSACC    |
| AKAP9    | CDKN1A  | ERC1    | HSPG2    | MLXIP   | PLPP3    | SORBS1  | TSPYL2   |
| ALOX5    | CHST15  | FAM24B  | IFI6     | MRAS    | PPM1H    | SPIB    | TTR      |
| ALOX5AP  | CLASP1  | FAT1    | IFIT1    | MUC20   | PRKDC    | SPIN2B  | UBR4     |
| ALPK3    | CLIC5   | FHL1    | IGF2R    | MUC5B   | PRSS1    | SRCAP   | UGGT1    |
| ANK3     | CLU     | FILIP1L | INPP5J   | MX1     | PRSS2    | ST6GAL1 | USP9X    |
| ANKRD17  | CPZ     | FLNC    | IQSEC1   | MXRA8   | REG4     | SYNPO   | VPS13C   |
| APOE     | CREB3L1 | FN1     | KIAA1671 | MYLK    | RGL1     | SYTL3   | WFDC2    |
| ARHGEF12 | CTNND1  | FOLR1   | KLK5     | MYO10   | RGMA     | TAX1BP3 | ZKSCAN1  |
| ARID1A   | CX3CL1  | FOXJ1   | KLK6     | NCF4    | RNF213   | TBC1D16 | ZNF385A  |
| ARID5B   | CXCL6   | GDF15   | KLK7     | NSD1    | RRAD     | TCF7    | ZNF618   |
| ARRDC4   | CYFIP2  | GGT1    | KMT2A    | NTN4    | SAA1     | TCN1    |          |
| ASH1L    | DGAT2   | GOLGB1  | KRT23    | NXN     | SAA2     | TGFB2   |          |
| ATF7IP   | DGKH    | GOLT1A  | LCN2     | OLFM4   | SEC16A   | TGFBR3  |          |
| BAMBI    | DOK5    | GPR132  | LPP      | PARVA   | SERPINA1 | TGM2    |          |
| BCAM     | DST     | GPR176  | LRRC27   | PCYOX1L | SERPINB7 | TIMP2   |          |
| BSCL2    | DUOXA2  | GPSM1   | LUZP1    | PI3     | SEZ6L2   | TLN1    |          |
| C2       | DYNC1H1 | GPX2    | LYNX1    | PIGR    | SHROOM3  | TMEM25  |          |

NGS, next-generation sequencing.
